# Supplementary material for: Dynamic transcriptome profiles within spermatogonial and spermatocyte populations during postnatal testis maturation revealed by single-cell sequencing
Source: PLoS Genet. 2019 Mar 20;15(3):e1007810. doi: 10.1371/journal.pgen.1007810 (PMC6443194; doi:10.1371/journal.pgen.1007810)
Supplement: S5 Table — Reactome pathways with significantly differential expression as a function of mouse age in spermatogonia are included (FDR < 0.05); the same results are displayed in Cytoscape diagrams in Fig 5. The table includes GSEA results for each significant Reactome pathway, including the gene list, enrichment score (ES), normalized enrichment score (NES), and results of the statistical test for enrichment. (XLSX) [file pgen.1007810.s015.xlsx]

## Sheet: Table S5-SpermatogoniaGSEA
Spermatogonia: GSEA Reactome results (FDR<0.05)
Reactome Gene Set	Genes	# genes	ES	NES	p-value	FDR q-value	FWER q-value
NONSENSE_MEDIATED_DECAY_ENHANCED_BY_THE_EXON_JUNCTION_COMPLEX	FAU|RPL13A|RPL10A|RPL3|RPL3L|RPL4|RPL6|RPL7|RPL8|RPL11|RPL13|RPL18|RPL19|RPL22|RPL23A|RPL24|RPL26|RPL27|RPL30|RPL27A|RPL29|RPL32|RPL34|RPL37|RPL38|RPL41|RPLP0|RPLP1|RPS2|RPS3|RPS3A|RPS4X|RPS5|RPS7|RPS9|RPS10|RPS11|RPS12|RPS13|RPS14|RPS15|RPS15A|RPS16|RPS18|RPS20|RPS21|RPS23|RPS25|RPS26|RPS27|RPS28|UBA52|RPL23|RNPS1|EIF4G1|ETF1|CASC3|NCBP2|SMG1|SMG6|SMG5|GSPT2|UPF2|MAGOH|NCBP1|PPP2CA|PPP2R1A|SMG8|…	75	-0.5143	-2.5777	0	0	0
PEPTIDE_CHAIN_ELONGATION	EEF2|FAU|RPL13A|RPL10A|RPL3|RPL3L|RPL4|RPL6|RPL7|RPL8|RPL11|RPL13|RPL18|RPL19|RPL22|RPL23A|RPL24|RPL26|RPL27|RPL30|RPL27A|RPL29|RPL32|RPL34|RPL37|RPL38|RPL41|RPLP0|RPLP1|RPS2|RPS3|RPS3A|RPS4X|RPS5|RPS7|RPS9|RPS10|RPS11|RPS12|RPS13|RPS14|RPS15|RPS15A|RPS16|RPS18|RPS20|RPS21|RPS23|RPS25|RPS26|RPS27|RPS28|UBA52|RPL23	54	-0.6186	-2.8954	0	0	0
INFLUENZA_VIRAL_RNA_TRANSCRIPTION_AND_REPLICATION	FAU|RPL13A|RPL10A|RPL3|RPL3L|RPL4|RPL6|RPL7|RPL8|RPL11|RPL13|RPL18|RPL19|RPL22|RPL23A|RPL24|RPL26|RPL27|RPL30|RPL27A|RPL29|RPL32|RPL34|RPL37|RPL38|RPL41|RPLP0|RPLP1|RPS2|RPS3|RPS3A|RPS4X|RPS5|RPS7|RPS9|RPS10|RPS11|RPS12|RPS13|RPS14|RPS15|RPS15A|RPS16|RPS18|RPS20|RPS21|RPS23|RPS25|RPS26|RPS27|RPS28|UBA52|RPL23|GRSF1|GTF2F1|GTF2F2|HSP90AA1|IPO5|POLR2A|POLR2B|POLR2C|POLR2D|POLR2E|POLR2F|POLR2G|POLR2…	71	-0.5229	-2.5655	0	0	0
3_UTR_MEDIATED_TRANSLATIONAL_REGULATION	FAU|RPL13A|RPL10A|RPL3|RPL3L|RPL4|RPL6|RPL7|RPL8|RPL11|RPL13|RPL18|RPL19|RPL22|RPL23A|RPL24|RPL26|RPL27|RPL30|RPL27A|RPL29|EIF1AX|RPL32|EIF2S1|RPL34|EIF4A2|RPL37|EIF4B|RPL38|EIF4E|RPL41|EIF3K|RPLP0|EIF3E|RPLP1|RPS2|EIF4H|RPS3|EIF3A|RPS3A|EIF3B|RPS4X|EIF3D|RPS5|EIF3F|RPS7|EIF3G|RPS9|EIF3H|RPS10|EIF3I|RPS11|EIF3J|RPS12|EIF2S2|RPS13|RPS14|RPS15|RPS15A|RPS16|RPS18|RPS20|RPS21|RPS23|RPS25|RPS26|RPS27|…	71	-0.494	-2.386	0	0	0
SRP_DEPENDENT_COTRANSLATIONAL_PROTEIN_TARGETING_TO_MEMBRANE	FAU|RPL13A|RPL10A|RPL3|RPL3L|RPL4|RPL6|RPL7|RPL8|RPL11|RPL13|RPL18|RPL19|RPL22|RPL23A|RPL24|RPL26|RPL27|RPL30|RPL27A|RPL29|RPL32|RPL34|RPL37|RPL38|RPL41|RPLP0|RPLP1|RPS2|RPS3|RPS3A|RPS4X|RPS5|RPS7|RPS9|RPS10|RPS11|RPS12|RPS13|RPS14|RPS15|RPS15A|RPS16|RPS18|RPS20|RPS21|RPS23|RPS25|RPS26|RPS27|RPS28|UBA52|RPL23|SEC61B|DDOST|TRAM1|SEC11A|SEC61G|SPCS1|SEC61A1|SEC61A2|SPCS3|RPN1|RPN2|SRP9|SRP14|SRP19|…	75	-0.53	-2.6714	0	0	0
INFLUENZA_LIFE_CYCLE	FAU|RPL13A|RPL10A|RPL3|RPL3L|RPL4|RPL6|RPL7|RPL8|RPL11|RPL13|RPL18|RPL19|RPL22|RPL23A|RPL24|RPL26|RPL27|RPL30|RPL27A|RPL29|RPL32|RPL34|RPL37|RPL38|RPL41|RPLP0|RPLP1|RPS2|RPS3|RPS3A|RPS4X|RPS5|RPS7|RPS9|RPS10|RPS11|RPS12|RPS13|RPS14|RPS15|RPS15A|RPS16|RPS18|RPS20|RPS21|RPS23|RPS25|RPS26|RPS27|RPS28|UBA52|RPL23|GRSF1|GTF2F1|GTF2F2|HSP90AA1|IPO5|POLR2A|POLR2B|POLR2C|POLR2D|POLR2E|POLR2F|POLR2G|POLR2…	102	-0.4323	-2.2934	0	0.0004	0.002
SIGNALING_BY_TGF_BETA_RECEPTOR_COMPLEX	UBA52|XPO1|CDK8|CDK9|STUB1|CDKN2B|STRAP|PARP1|E2F4|E2F5|FKBP1A|ARHGEF18|PPP1R15A|WWTR1|HDAC1|JUNB|RHOA|SMAD2|SMAD3|SMAD4|SMAD7|MEN1|MYC|FURIN|SERPINE1|F11R|PARD6A|UCHL5|TRIM33|PPM1A|PPP1CA|PPP1CB|PPP1CC|PRKCZ|PARD3|PMEPA1|SMURF1|CGN|RBL1|TGIF2|SMURF2|SKI|SKIL|SP1|TGFB1|TGFBR1|TGFBR2|TGIF1|UBE2D1|UBE2D3|USP9X|CCNC|CCNT1|CCNT2|MTMR4|ZFYVE9|NCOR1|NCOR2	58	-0.4816	-2.2732	0	0.0005	0.003
TRANSLATION	EEF1D|EEF2|EIF2B1|EIF4EBP1|FAU|EIF5|RPL13A|RPL10A|EIF2B4|RPL3|EIF2B3|RPL3L|EIF2B2|RPL4|EIF2B5|RPL6|EIF5B|RPL7|RPL8|RPL11|RPL13|RPL18|RPL19|RPL22|RPL23A|RPL24|RPL26|RPL27|RPL30|RPL27A|RPL29|RPL32|RPL34|RPL37|RPL38|RPL41|RPLP0|RPLP1|RPS2|RPS3|RPS3A|RPS4X|RPS5|RPS7|RPS9|RPS10|RPS11|RPS12|RPS13|RPS14|RPS15|RPS15A|RPS16|RPS18|RPS20|RPS21|RPS23|RPS25|RPS26|RPS27|RPS28|UBA52|RPL23|SEC61B|DDOST|TRAM1|SEC…	106	-0.4081	-2.1915	0	0.002	0.013
SCF_BETA_TRCP_MEDIATED_DEGRADATION_OF_EMI1	CUL1|BTRC|PSMA1|PSMA2|PSMA3|PSMA4|PSMA5|PSMA6|PSMA7|PSMB1|PSMB2|PSMB3|PSMB4|PSMB5|PSMB6|PSMB7|PSMB8|PSMB9|PSMB10|FBXO5|PSMC1|PSMC2|PSMC3|PSMC4|PSMC5|PSMC6|PSMD1|PSMD2|PSMD3|PSMD4|PSMD5|PSMD14|PSMD7|PSMD8|PSMD9|PSMD11|PSMA8|PSMD12|PSMD13|PSME1|PSME2|CDC20|PSME4|UBA52|PSMF1|PSMD6|SKP1	47	0.521	2.1628	0	0.0042	0.022
SIGNALING_BY_ERBB4	MAPK1|MAPK3|MAP2K1|MAP2K2|RAF1|AKT3|CDKN1A|CDKN1B|YAP1|WWP1|CHUK|THEM4|SHC1|CREB1|SOS1|CSH1|NRG4|HBEGF|YWHAB|EGF|EGFR|ERBB3|CDK1|ERBB4|AKT1|AKT2|ESR1|FOXO1|FOXO3|TAB2|PHLPP1|NCSTN|MTOR|RICTOR|SH2B1|GFAP|GHR|GSK3A|NRG1|NR4A1|JAK2|MDM2|FOXO4|NEDD4|APH1A|PDPK1|WWOX|PIK3CA|PIK3R1|PSENEN|PSEN1|PSEN2|BAD|PTEN|UBA52|TRIB3|RPS6KB2|CXCL12|MLST8|SKP1|STAT5A|STAT5B|ADAM17|TSC2|MAPKAP1|APH1B|CASP9|AKT1S1|CUL…	77	-0.4196	-2.1294	0	0.0044	0.031
P53_INDEPENDENT_G1_S_DNA_DAMAGE_CHECKPOINT	CHEK2|PSMA1|PSMA2|PSMA3|PSMA4|PSMA5|PSMA6|PSMA7|PSMB1|PSMB2|PSMB3|PSMB4|PSMB5|ATM|PSMB6|PSMB7|PSMB8|PSMB9|PSMB10|PSMC1|PSMC2|PSMC3|PSMC4|PSMC5|PSMC6|PSMD1|CDC25A|PSMD2|PSMD3|PSMD4|PSMD5|PSMD14|PSMD7|PSMD8|PSMD9|PSMD11|PSMA8|PSMD12|PSMD13|PSME1|PSME2|PSME4|UBA52|PSMF1|PSMD6|CHEK1	46	0.4947	2.0777	0	0.0056	0.075
ER_PHAGOSOME_PATHWAY	B2M|TAP1|TAP2|PSMD14|PSMA8|PSME4|UBA52|SEC61B|HLA-B|SEC61G|PDIA3|SEC61A1|SEC61A2|CALR|PSMA1|PSMA2|PSMA3|PSMA4|PSMA5|PSMA6|PSMA7|PSMB1|PSMB2|PSMB3|PSMB4|PSMB5|PSMB6|PSMB7|PSMB8|PSMB9|PSMB10|PSMC1|PSMC2|PSMC3|PSMC4|PSMC5|PSMC6|PSMD1|PSMD2|PSMD3|PSMD4|PSMD5|PSMD7|PSMD8|PSMD9|PSMD11|PSMD12|PSMD13|PSME1|PSME2|PSMF1|PSMD6	52	0.4961	2.094	0	0.0063	0.063
REGULATION_OF_APOPTOSIS	PAK2|PSMD14|PSMA8|PSME4|UBA52|CASP9|DAPK1|DAPK3|PSMA1|DAPK2|PSMA2|APPL1|PSMA3|PSMA4|PSMA5|PSMA6|PSMA7|PSMB1|PSMB2|PSMB3|UNC5B|PSMB4|PSMB5|ARHGAP10|PSMB6|PSMB7|PSMB8|PSMB9|PSMB10|PSMC1|PSMC2|PSMC3|PSMC4|PSMC5|PSMC6|PSMD1|PSMD2|PSMD3|PSMD4|PSMD5|PSMD7|PSMD8|PSMD9|PSMD11|MAGED1|PSMD12|PSMD13|PSME1|PSME2|PSMF1|PSMD6|CASP3|UNC5A	53	0.4818	2.0796	0	0.0063	0.074
CELL_SURFACE_INTERACTIONS_AT_THE_VASCULAR_WALL	PIK3CB|PIK3R2|SHC1|SOS1|SRC|MERTK|SLC7A9|COL1A1|COL1A2|F2|FCER1G|FN1|SLC7A8|SLC16A8|SLC7A11|PPIL2|FYN|ANGPT2|GRB7|GRB14|ITGA3|ITGAV|ITGB1|ITGB3|L1CAM|LCK|MAG|ATP1B1|ATP1B2|PIK3CA|ATP1B3|PIK3R1|PECAM1|PF4V1|TREM1|PROC|PROS1|PTPN6|JAM2|SELL|SELP|SLC3A2|SLC16A1|BSG|THBD|YES1|SLC7A5|JAM3|CAV1|DOK2|SLC7A7|SLC7A6|SLC16A3|CD2|CD47|F11R|GRB2|HRAS|KRAS|NRAS|PLCG1	61	-0.4163	-2.0308	0	0.0091	0.09
NGF_SIGNALLING_VIA_TRKA_FROM_THE_PLASMA_MEMBRANE	AKT3|CDKN1A|CDKN1B|CHUK|THEM4|CREB1|AKT1|AKT2|FOXO1|FOXO3|PHLPP1|MTOR|RICTOR|GSK3A|NR4A1|MDM2|FOXO4|PDPK1|PIK3CA|PIK3R1|BAD|PTEN|TRIB3|RPS6KB2|MLST8|TSC2|MAPKAP1|CASP9|AKT1S1|DUSP3|DUSP4|DUSP6|DUSP7|ELK1|MEF2A|MEF2C|ATF1|PPP2CB|PPP2R1B|PPP2R5D|MAPK7|PPP2CA|RPS6KA1|PPP2R1A|RPS6KA2|RPS6KA3|RPS6KA5|DNAL4|ADCY1|ADCY2|ADCY3|ADCY5|FRS2|ADCY6|ADCY7|CRK|ADCY9|MAPK14|ADCYAP1R1|SHC2|AP2M1|GRB2|AP2S1|RAPGEF…	124	-0.3642	-2.0338	0	0.0092	0.086
SIGNALING_BY_SCF_KIT	KIT|KITLG|MAPK1|MMP9|MAPK3|RAC1|STAT1|MAP2K1|TEC|MAP2K2|VAV1|PIK3R2|SOCS1|RAF1|CBL|AKT3|SOCS6|CDKN1A|GRAP2|CDKN1B|PRKCA|CHUK|THEM4|CREB1|SOS1|SRC|STAT3|YWHAB|CDK1|AKT1|AKT2|FOXO1|FOXO3|PHLPP1|MTOR|RICTOR|FYN|GRB7|GSK3A|NR4A1|JAK2|MDM2|FOXO4|LCK|PDPK1|PIK3CA|PIK3R1|BAD|PTEN|TRIB3|PTPN6|RPS6KB2|MLST8|STAT5A|STAT5B|TSC2|YES1|MAPKAP1|CASP9|AKT1S1|SH2B3|SH2B2|GRB2|GRAP|CHEK1|HRAS|CMA1|KRAS|FER|NRAS|FE…	72	-0.3979	-1.986	0	0.011	0.151
REGULATION_OF_ORNITHINE_DECARBOXYLASE_ODC	PSMA1|PSMA2|PSMA3|PSMA4|OAZ1|PSMA5|OAZ2|PSMA6|ODC1|PSMA7|PSMB1|PSMB2|PSMB3|AZIN1|PSMB4|PSMB5|PSMB6|PSMB7|PSMB8|PSMB9|PSMB10|PSMC1|PSMC2|PSMC3|PSMC4|PSMC5|PSMC6|PSMD1|PSMD2|PSMD3|PSMD4|PSMD5|PSMD14|PSMD7|PSMD8|PSMD9|PSMD11|PSMA8|PSMD12|PSMD13|PSME1|PSME2|PSME4|PSMF1|PSMD6|NQO1	46	0.4842	2.012	0	0.0111	0.161
MAP_KINASE_ACTIVATION_IN_TLR_CASCADE	MAPK1|MAPK3|MAPK11|MAP2K1|MAP2K2|ATF2|DUSP3|DUSP4|DUSP6|DUSP7|ELK1|FOS|JUN|MEF2A|CREB1|MEF2C|NOD1|ATF1|TAB1|PPP2CB|TAB3|PPP2R1B|IRAK1|PPP2R5D|MAPKAPK3|IRAK2|MAPK7|MAPKAPK2|MAPK8|MAP2K3|CDK1|MAPK9|MAP2K4|MAPK10|MAP3K7|PPP2CA|RPS6KA1|TRAF6|PPP2R1A|RPS6KA2|IKBKG|RPS6KA3|RIPK2|RPS6KA5|TAB2|MAPK14	46	-0.4415	-1.9684	0	0.0113	0.169
DEVELOPMENTAL_BIOLOGY	RAC1|MED6|MED16|RANBP9|PLXNC1|CDK4|CDK5|PAK4|MYL12B|CAP2|CAP1|NCOA2|SEMA4D|CEBPB|DPYSL4|DRAP1|LEFTY1|CFL1|PPARGC1A|STIP1|MED8|CNTN1|COL2A1|COL3A1|COL4A1|COL4A2|COL4A3|COL4A4|COL4A5|COL5A1|COL6A1|COL6A2|COL6A3|COL9A1|COL9A2|COL9A3|UNC5D|CREBBP|CRMP1|CSNK2A1|CSNK2A2|CSNK2B|NCAN|DLG1|DLG3|DOCK1|DPYSL2|DPYSL3|EBF1|EGR2|EP300|ERBB2|ALCAM|MED19|UNC5B|FGFR1|ABLIM3|NCOA6|CDK19|PLXND1|CLASP1|ARHGEF12|SRGA…	327	-0.3011	-1.9578	0	0.0117	0.186
DESTABILIZATION_OF_MRNA_BY_AUF1_HNRNP_D0	PSMA1|PSMA2|PSMA3|PSMA4|EIF4G1|PSMA5|PSMA6|PSMA7|PSMB1|PSMB2|PSMB3|PSMB4|PSMB5|PSMB6|PSMB7|PSMB8|PSMB9|PSMB10|PSMC1|PSMC2|PSMC3|PSMC4|PSMC5|PSMC6|PSMD1|PSMD2|PSMD3|PSMD4|PSMD5|PSMD14|PSMD7|PSMD8|PSMD9|PSMD11|PSMA8|PSMD12|PSMD13|PSME1|PSME2|PSME4|UBA52|PSMF1|PSMD6|HNRNPD|HSPB1	45	0.4764	1.975	0	0.0143	0.221
SCFSKP2_MEDIATED_DEGRADATION_OF_P27_P21	SKP2|CDKN1A|CDKN1B|PSMD14|UBA52|SKP1|CDK2|CUL1|PSMA1|PSMA2|PSMA3|PSMA4|PSMA5|PSMA6|PSMA7|PSMB1|PSMB2|PSMB3|PSMB4|PSMB5|PSMB6|PSMB7|PSMB8|PSMB9|PSMB10|PSMC1|PSMC2|PSMC3|PSMC4|PSMC5|CCNA1|PSMC6|CCNE1|PSMD1|PSMD2|PSMD3|PSMD4|PSMD5|PSMD7|CKS1B|PSMD8|PSMD9|PSMD11|PSMD12|PSMD13|PSME1|PSME2|PSMF1|PSMD6|CCNA2|CCNE2	51	0.4632	1.9372	0	0.0156	0.299
P53_DEPENDENT_G1_DNA_DAMAGE_RESPONSE	CDKN1A|CDKN1B|PSMD14|MDM2|PSMA8|TP53|PSME4|UBA52|CDK2|PSMA1|PSMA2|PSMA3|PSMA4|PSMA5|PSMA6|PSMA7|PSMB1|PSMB2|PSMB3|PSMB4|PSMB5|ATM|PSMB6|PSMB7|PSMB8|PSMB9|PSMB10|PSMC1|PSMC2|PSMC3|PSMC4|PSMC5|PSMC6|CCNE1|PSMD1|PSMD2|PSMD3|PSMD4|PSMD5|PSMD7|PSMD8|PSMD9|PSMD11|PSMD12|PSMD13|PSME1|PSME2|PSMF1|PSMD6|CCNE2	50	0.4619	1.9444	0	0.0158	0.282
INTEGRIN_CELL_SURFACE_INTERACTIONS	LAMB1|LAMC1|RAP1A|SHC1|SOS1|SRC|AKT1|COL1A1|COL1A2|CSK|FN1|ITGA3|ITGAV|ITGB1|ITGB3|PDPK1|PECAM1|PTK2|COL2A1|SYK|COL4A1|COL4A2|JAM2|COL4A3|COL4A4|COL4A5|BSG|JAM3|RASGRP1|RASGRP2|RAPGEF3|RAPGEF4|FGG|APBB1IP|PTPN1|VWF|BCAR1|FBN1|ITGA11|TLN1|ICAM1|ICAM4|ITGAE|ITGB4|F11R|ITGB5|ITGB7|ITGB8|LAMA2|LAMA5|LAMB2|SPP1|THBS1|VCAM1|CDH1|LAMA1|CRK|ITGA1|ITGA2|ITGA2B|GRB2|ITGA9	62	-0.3887	-1.8924	0	0.0169	0.313
L1CAM_INTERACTIONS	DNM2|LAMB1|MAPK1|LAMC1|MAPK3|RAC1|CD24|MAP2K1|MAP2K2|MSN|NCAM1|SH3GL2|SRC|NRCAM|EGFR|PAK1|RANBP9|ITGAV|ITGB1|CLTA|ITGB3|CLTC|L1CAM|STIP1|CNTN1|SPTBN4|RDX|SCN1B|SCN5A|SCN7A|SCN8A|CSNK2A1|SDCBP|CSNK2A2|CSNK2B|NCAN|DLG1|DLG3|DPYSL2|SPTAN1|SPTB|SPTBN1|SPTBN2|ALCAM|FGFR1|CNTN2|RPS6KA1|RPS6KA2|RPS6KA3|RPS6KA5|KIF4A|EZR|CNTN6|RPS6KA6|LAMA1|ANK1|ANK3|CNTNAP1|NUMB|NRP2|NRP1|ITGA1|ITGA2|ITGA2B|AP2M1|ITGA9|…	74	-0.3687	-1.8825	0	0.0172	0.337
PLATELET_ACTIVATION_SIGNALING_AND_AGGREGATION	RAC1|VAV1|AKT3|CD36|EGF|AKT1|AKT2|CSK|CAP1|PDPK1|CFL1|PIK3CA|PIK3R1|SYK|RASGRP1|RASGRP2|RAPGEF3|RAPGEF4|ADRA2A|FGG|GP1BB|GP5|APBB1IP|PTPN1|VWF|BCAR1|THBS1|GNAI1|GNAI2|GNAI3|P2RY1|PLA2G4A|TBXA2R|ABCC4|VAV3|MGLL|CLU|DGKK|PIK3R6|CRK|DGKA|MAPK14|DGKG|DGKH|ITGA2B|DGKQ|GRB2|ALB|F8|F13A1|DAGLB|RHOB|ALDOA|HABP4|PIK3R5|RHOG|LAT|ITPR2|MAPK1|BRPF3|ITPR3|MAPK3|SCG3|HSPA5|APOA1|APP|PIK3CB|LAMP2|PIK3R2|PDGFA|R…	156	-0.3183	-1.8597	0	0.0184	0.393
REGULATION_OF_MITOTIC_CELL_CYCLE	SKP2|CDK1|PSMD14|PSMA8|PLK1|CDC14A|PSME4|UBA52|SKP1|AURKA|CDK2|CUL1|BTRC|PSMA1|PSMA2|PSMA3|PSMA4|PSMA5|PSMA6|PSMA7|PSMB1|UBE2E1|PSMB2|PSMB3|PSMB4|PSMB5|PSMB6|PSMB7|PSMB8|PSMB9|PSMB10|FBXO5|PSMC1|PSMC2|PSMC3|PSMC4|PSMC5|CCNA1|PSMC6|AURKB|PSMD1|PSMD2|ANAPC10|PSMD3|UBE2C|PSMD4|CDC26|PSMD5|ANAPC2|PSMD7|ANAPC4|PSMD8|ANAPC5|PSMD9|MAD2L1|ANAPC7|PSMD11|ANAPC11|PSMD12|BUB1B|PSMD13|ANAPC1|BUB3|PSME1|CDC23|…	74	0.4152	1.9081	0	0.0192	0.375
CDT1_ASSOCIATION_WITH_THE_CDC6_ORC_ORIGIN_COMPLEX	PSMD14|PSMA8|PSME4|GMNN|UBA52|ORC6|ORC3|PSMA1|PSMA2|ORC1|PSMA3|ORC2|PSMA4|ORC4|PSMA5|ORC5|PSMA6|PSMA7|PSMB1|PSMB2|PSMB3|PSMB4|PSMB5|PSMB6|PSMB7|CDT1|PSMB8|PSMB9|PSMB10|MCM8|PSMC1|CDC6|PSMC2|PSMC3|PSMC4|PSMC5|PSMC6|PSMD1|PSMD2|PSMD3|PSMD4|PSMD5|PSMD7|PSMD8|PSMD9|PSMD11|PSMD12|PSMD13|PSME1|PSME2|PSMF1|PSMD6	52	0.4465	1.8829	0.0016	0.0229	0.448
ASPARAGINE_N_LINKED_GLYCOSYLATION	PREB|ALG3|SEC24B|SEC23A|MAN1A2|MAN1B1|MGAT4B|MGAT4A|DAD1|DPAGT1|ALG14|DOLK|SEC31A|GANAB|DDOST|FUT8|MGAT4C|B4GALT1|PDIA3|ALG5|GMPPB|GMPPA|ALG6|ST8SIA6|RPN1|CALR|STT3A|RPN2|LMAN1|CANX|MAN1A1|MAN2A1|MGAT1|MGAT2|MGAT5|MPI|ALG11|ST8SIA3|SAR1B|PGM3|PMM1|PMM2|DPM3|EDEM2|UGGT2|PRKCSH|ALG1|UGGT1|MAN1C1|DOLPP1|SEC13|ST6GAL1|GNPNAT1|MOGS|ALG8|ALG12|MANEA|ALG9|TUSC3|EDEM3|ALG10|ALG2|B4GALT4|B4GALT3|B4GALT2|D…	76	-0.3601	-1.8267	0	0.0242	0.512
NCAM_SIGNALING_FOR_NEURITE_OUT_GROWTH	ARTN|MAPK1|MAPK3|MAP2K1|MAP2K2|RAF1|NCAM1|CREB1|SOS1|SRC|NRTN|YWHAB|CDK1|COL1A1|COL1A2|FYN|PRNP|PTK2|COL2A1|COL3A1|COL4A1|SPTBN4|COL4A2|COL4A3|COL4A4|COL4A5|COL5A1|COL6A1|COL6A2|COL6A3|COL9A1|COL9A2|COL9A3|GFRA4|NCAN|SPTAN1|SPTB|SPTBN1|SPTBN2|FGFR1|CNTN2|RPS6KA5|GFRA1|GFRA2|CACNB1|CACNB2|CACNB3|CACNB4|ST8SIA4|ST8SIA2|CACNA1H|GRB2|CACNA1G|AGRN|HRAS|KRAS|NRAS	57	-0.38	-1.7924	0.0026	0.0275	0.602
TRAF6_MEDIATED_INDUCTION_OF_NFKB_AND_MAP_KINASES_UPON_TLR7_8_OR_9_ACTIVATION	MAPK1|MAPK3|MAPK11|MAP2K1|APP|MAP2K2|CHUK|CREB1|NOD1|TAB1|TAB3|IRAK1|MAPKAPK3|IRAK2|MAPKAPK2|MAP2K3|CDK1|MAP2K4|MAP3K7|TRAF6|IKBKG|RIPK2|TAB2|UBA52|RELA|ATF2|DUSP3|DUSP4|DUSP6|DUSP7|ELK1|FOS|IKBKB|JUN|MEF2A|MEF2C|ATF1|MYD88|PPP2CB|NFKBIA|PPP2R1B|PPP2R5D|MAPK7|MAPK8|MAPK9|MAPK10|PPP2CA|RPS6KA1|PPP2R1A|RPS6KA2|RPS6KA3|RPS6KA5|AGER|MAP3K1|NFKB2|NFKBIB|IRAK4|ECSIT|PELI2|PELI1|UBE2N|MAPK14	62	-0.3647	-1.7645	0	0.0307	0.678
NFKB_AND_MAP_KINASES_ACTIVATION_MEDIATED_BY_TLR4_SIGNALING_REPERTOIRE	MAPK1|MAPK3|MAPK11|MAP2K1|APP|MAP2K2|CHUK|CREB1|NOD1|TAB1|TAB3|IRAK1|MAPKAPK3|IRAK2|MAPKAPK2|MAP2K3|CDK1|MAP2K4|MAP3K7|TRAF6|IKBKG|RIPK2|TAB2|UBA52|RELA|TICAM1|LY96|TLR3|RIPK1|CD14|ATF2|DUSP3|DUSP4|DUSP6|DUSP7|ELK1|FOS|IKBKB|JUN|MEF2A|MEF2C|ATF1|PPP2CB|NFKBIA|PPP2R1B|PPP2R5D|MAPK7|MAPK8|MAPK9|MAPK10|PPP2CA|RPS6KA1|PPP2R1A|RPS6KA2|RPS6KA3|RPS6KA5|AGER|NFKB2|NFKBIB|MAPK14	60	-0.3678	-1.7539	0.005	0.0308	0.702
SIGNALLING_BY_NGF	RAC1|VAV1|IRAK1|TRAF6|RIPK2|UBA52|BCL2L11|NET1|PRDM4|AKAP13|FGD4|ECT2|FGD2|FGD1|SORCS3|ARHGEF9|ITGB3BP|TIAM2|AATF|ARHGEF16|ABR|HDAC2|IKBKB|ARHGAP4|ARHGDIA|MCF2|MYD88|NFKBIA|NGFR|ARHGEF4|ARHGEF3|PCSK5|PRKCI|PPP2CA|RTN4|PPP2R1A|PREX1|ARHGEF12|RASGRF1|RASGRF2|ITSN1|PLEKHG2|SMPD2|TIAM1|CASP2|OBSCN|LINGO1|SQSTM1|FGD3|KALRN|ARHGEF1|ARHGEF2|ARHGEF6|MAGED1|ARHGEF17|FRS2|CRK|MAPK14|SHC2|GRB2|RAPGEF1|HRAS|…	198	-0.2958	-1.7677	0	0.031	0.669
SIGNALING_BY_FGFR_IN_DISEASE	STAT1|CBL|AKT3|CDKN1A|CDKN1B|CHUK|THEM4|CREB1|CPSF6|CNTRL|AKT1|FGFR1OP|AKT2|CUX1|FGF1|FOXO1|FGF2|FOXO3|FGF3|GAB1|FGF5|PHLPP1|FGF8|FGF9|MTOR|FGFR3|RICTOR|FGFR2|FGFR4|FGFR1OP2|GSK3A|MYO18A|BCR|NR4A1|ZMYM2|TRIM24|MDM2|FGF18|FOXO4|PDPK1|PIK3CA|PIK3R1|BAD|PTEN|UBA52|TRIB3|RPS6KB2|MLST8|STAT5A|STAT5B|TSC2|MAPKAP1|CASP9|AKT1S1|PPP2CB|FGFR1|KLB|PPP2CA|PPP2R1A|FRS3|ADCY1|ADCY2|ADCY3|ADCY5|FRS2|ADCY6|ADCY7…	104	-0.3284	-1.7569	0	0.0312	0.696
SIGNALING_BY_EGFR_IN_CANCER	CBL|AKT3|CDKN1A|CDKN1B|CHUK|THEM4|CREB1|EGF|EGFR|AKT1|AKT2|FOXO1|CSK|FOXO3|GAB1|PHLPP1|PAG1|MTOR|RICTOR|GSK3A|NR4A1|MDM2|FOXO4|PDPK1|PIK3CA|PIK3R1|BAD|PTEN|UBA52|TRIB3|RPS6KB2|MLST8|ADAM17|TSC2|MAPKAP1|CASP9|AKT1S1|HSP90AA1|ADCY1|ADCY2|ADCY3|ADCY5|ADAM10|ADCY6|SPRY1|ADCY7|SPRY2|ADCY9|STAM2|CDC37|AP2M1|GRB2|AP2S1|EPS15|LRIG1|HRAS|AP2A1|EPN1|KRAS|AP2A2|SH3KBP1|NRAS|AP2B1|EPS15L1|PLCG1|STAM|ADAM12|I…	98	-0.3316	-1.7598	0	0.0316	0.692
TRANSCRIPTION	SRRM1|PAPOLA|HIST2H3C|CLP1|H3F3A|NUDT21|UBTF|U2AF2|HIST1H3A|LSM11|HIST1H3D|CSTF1|MBD2|CSTF2|CSTF3|ZNF473|CPSF1|NFX1|CDC40|PCF11|CPSF3|CPSF2|SRSF1|SRSF2|SRSF3|SRSF4|SRSF5|SRSF6|SRSF7|SNRPB|SNRPD3|SNRPF|SLBP|CPSF7|LSM10|SRSF9|SRSF11|DHX38|CDK7|EHMT2|CBX3|ERCC2|ERCC3|ERCC6|POLR1A|GTF2H1|GTF2H3|GTF2H4|MNAT1|POLR1D|RRN3|POLR1B|KAT2B|TAF1C|TAF1B|TAF1A|CCNH|POLR1C|RNPS1|NCBP2|MAGOH|NCBP1|HIST1H2BA|UPF3B…	144	-0.3072	-1.7576	0	0.0316	0.696
METABOLISM_OF_PROTEINS	EEF2|FAU|RPL13A|RPL10A|RPL3|RPL3L|RPL4|RPL6|RPL7|RPL8|RPL11|RPL13|RPL18|RPL19|RPL22|RPL23A|RPL24|RPL26|RPL27|RPL30|RPL27A|RPL29|RPL32|RPL34|RPL37|RPL38|RPL41|RPLP0|RPLP1|RPS2|RPS3|RPS3A|RPS4X|RPS5|RPS7|RPS9|RPS10|RPS11|RPS12|RPS13|RPS14|RPS15|RPS15A|RPS16|RPS18|RPS20|RPS21|RPS23|RPS25|RPS26|RPS27|RPS28|UBA52|RPL23|SEC61B|DDOST|TRAM1|SEC11A|SEC61G|SPCS1|SEC61A1|SEC61A2|SPCS3|RPN1|RPN2|SRP9|SRP14|S…	330	-0.2711	-1.7421	0	0.0328	0.73
AXON_GUIDANCE	RAC1|RANBP9|PLXNC1|CDK5|PAK4|MYL12B|CAP2|CAP1|SEMA4D|DPYSL4|CFL1|STIP1|CNTN1|COL2A1|COL3A1|COL4A1|COL4A2|COL4A3|COL4A4|COL4A5|COL5A1|COL6A1|COL6A2|COL6A3|COL9A1|COL9A2|COL9A3|UNC5D|CRMP1|CSNK2A1|CSNK2A2|CSNK2B|NCAN|DLG1|DLG3|DOCK1|DPYSL2|DPYSL3|ERBB2|ALCAM|UNC5B|FGFR1|ABLIM3|PLXND1|CLASP1|ARHGEF12|SRGAP2|PIP5K1C|KIF4A|GFRA1|GFRA2|ABL2|CNTN6|RND1|HSP90AA1|RPS6KA6|GPC1|LAMA1|RGMB|ANK1|ANK3|ARHGAP35…	211	-0.2818	-1.7442	0	0.0328	0.727
ANTIGEN_PROCESSING_CROSS_PRESENTATION	B2M|TAP1|TAP2|CD36|PSMD14|ITGAV|PSMA8|PSME4|UBA52|SEC61B|HLA-B|SEC61G|PDIA3|MRC2|SEC61A1|SEC61A2|CALR|CYBA|CTSS|PSMA1|PSMA2|PSMA3|PSMA4|PSMA5|PSMA6|PSMA7|PSMB1|PSMB2|PSMB3|PSMB4|PSMB5|PSMB6|PSMB7|PSMB8|PSMB9|PSMB10|PSMC1|PSMC2|PSMC3|ITGB5|PSMC4|PSMC5|PSMC6|PSMD1|PSMD2|LNPEP|PSMD3|MRC1|PSMD4|PSMD5|NCF2|PSMD7|PSMD8|PSMD9|PSMD11|PSMD12|PSMD13|PSME1|PSME2|PSMF1|PSMD6	61	0.4136	1.8291	0	0.0351	0.618
MEMBRANE_TRAFFICKING	UBA52|GJC1|AP1M2|TGOLN2|GJB6|SNF8|COPE|AP1S1|AP3S1|CLTB|CHMP4B|COPA|COPB1|CPD|VPS37A|CTSZ|SH3D19|VPS37D|DAB2|AP1B1|AP1G1|DNASE2|COPZ1|AP4E1|SNAPIN|FTL|GAK|NECAP1|CHMP2B|BLOC1S1|GJA1|GJA3|GJA4|GJB1|GJB2|STAM2|GJB3|AP2M1|SNX5|VPS4A|CHMP2A|GNS|YIPF6|IGF2R|DNM1|ARCN1|STAM|DNM2|ARF1|BLOC1S3|HGS|M6PR|MYO6|OCRL|VPS36|SNX9|CHMP5|VTA1|PIK3C2A|TBC1D8B|VPS37C|ARFGAP1|GJC2|RAB5C|SORT1|SNX2|SH3GL2|SRC|STX4|VA…	106	-0.3126	-1.7131	0	0.0389	0.799
SIGNALING_BY_FGFR	ITPR2|MAPK1|ITPR3|MAPK3|PDE1A|PDE1B|MAP2K1|MAP2K2|PRKACB|RAF1|CBL|AKT3|PRKACG|CDKN1A|PRKAR1A|CDKN1B|PRKAR1B|PRKAR2B|PRKCA|CHUK|PRKCD|THEM4|PRKCE|SHC1|CREB1|SOS1|SRC|BRAF|YWHAB|CALM1|CALM2|CALM3|CAMK4|CDK1|AKT1|AKT2|FGF1|FOXO1|FGF2|FOXO3|FGF3|GAB1|FGF5|PHLPP1|FGF8|FGF9|MTOR|FGFR3|RICTOR|FGFR2|FGFR4|GSK3A|NR4A1|MDM2|FGF18|FOXO4|PDPK1|PIK3CA|PIK3R1|IL17RD|BAD|MKNK1|PTEN|UBA52|TRIB3|RPS6KB2|MLST8|TSC…	91	-0.3225	-1.6942	0.0028	0.0425	0.846
SIGNALING_BY_WNT	PPP2R5A|PPP2R5B|PPP2R5C|PPP2R5E|PSMD14|PSMA8|PSME4|UBA52|SKP1|CUL1|BTRC|PSMA1|PSMA2|PSMA3|APC|PSMA4|PSMA5|PSMA6|PSMA7|PSMB1|PPP2CB|PSMB2|PPP2R1B|PSMB3|PPP2R5D|PSMB4|PSMB5|PSMB6|PSMB7|PPP2CA|PSMB8|PPP2R1A|PSMB9|PSMB10|PSMC1|PSMC2|PSMC3|PSMC4|PSMC5|PSMC6|CSNK1A1|PSMD1|FRAT2|PSMD2|PSMD3|AXIN1|PSMD4|PSMD5|PSMD7|PSMD8|PSMD9|PSMD11|CTNNB1|PSMD12|PSMD13|PSME1|PSME2|PSMF1|PSMD6	59	0.4108	1.7946	0.0032	0.044	0.736
APC_C_CDH1_MEDIATED_DEGRADATION_OF_CDC20_AND_OTHER_APC_C_CDH1_TARGETED_PROTEINS_IN_LATE_MITOSIS_EARLY_G1	SKP2|PSMD14|PSMA8|PLK1|PSME4|UBA52|AURKA|PSMA1|PSMA2|PSMA3|PSMA4|PSMA5|PSMA6|PSMA7|PSMB1|UBE2E1|PSMB2|PSMB3|PSMB4|PSMB5|PSMB6|PSMB7|PSMB8|PSMB9|PSMB10|PSMC1|PSMC2|PSMC3|PSMC4|PSMC5|PSMC6|AURKB|PSMD1|PSMD2|ANAPC10|PSMD3|UBE2C|PSMD4|CDC26|PSMD5|ANAPC2|PSMD7|ANAPC4|PSMD8|ANAPC5|PSMD9|ANAPC7|PSMD11|ANAPC11|PSMD12|PSMD13|ANAPC1|PSME1|CDC23|PSME2|CDC16|CDC20|CDC27|UBE2D1|PSMF1|PSMD6	61	0.4043	1.785	0.0033	0.0454	0.767
