# Supplementary material for: Dynamic transcriptome profiles within spermatogonial and spermatocyte populations during postnatal testis maturation revealed by single-cell sequencing
Source: PLoS Genet. 2019 Mar 20;15(3):e1007810. doi: 10.1371/journal.pgen.1007810 (PMC6443194; doi:10.1371/journal.pgen.1007810)
Supplement: S6 Table — Model-based analysis of single-cell transcriptomics (MAST) was utilized to identify genes that are variably expressed in spermatocytes as a function of age. Genes listed in this table include “markers” (genes with significantly upregulated expression in all spermatocytes), as well as genes with significant variation in expression in spermatocytes during testis maturation. Data for these genes are depicted as row-normalized gene expression in individual cells in Fig 6. (XLSX) [file pgen.1007810.s016.xlsx]

## Sheet: Table S6-Fig6 gene list
Genes with variable expression in spermatocytes across developmental ages
row	gene	time_points
1	Rsph1	Spermatocytes Markers
2	Cox8c	Spermatocytes Markers
3	Cdc42ep3	Spermatocytes Markers
4	AA467197	Spermatocytes Markers
5	Lyar	Spermatocytes Markers
6	Acyp1	Spermatocytes Markers
7	Gm3448	Spermatocytes Markers
8	Tex101	Spermatocytes Markers
9	Hspa2	Spermatocytes Markers
10	Atxn7l3b	Spermatocytes Markers
11	Cenpv	Spermatocytes Markers
12	Ybx2	Spermatocytes Markers
13	Cox6b2	Spermatocytes Markers
14	Ggnbp1	Spermatocytes Markers
15	Mllt10	Spermatocytes Markers
16	Gm11837	Spermatocytes Markers
17	Mtl5	Spermatocytes Markers
18	Ddt	Spermatocytes Markers
19	Ndufaf3	Spermatocytes Markers
20	Fbp1	Spermatocytes Markers
21	2018-03-11	Spermatocytes Markers
22	Ankrd54	Spermatocytes Markers
23	1700010I14Rik	Spermatocytes Markers
24	Calm2	Spermatocytes Markers
25	BC049730	Spermatocytes Markers
26	Dnah8	Spermatocytes Markers
27	Ldha	Spermatocytes Markers
28	Nphp1	Spermatocytes Markers
29	Calm1	Spermatocytes Markers
30	1700028J19Rik	Spermatocytes Markers
31	Gnas	PND14
32	Gm26870	PND14
33	Oaz1	PND14
34	Bri3	PND14
35	Rplp0	PND14
36	Atp6v0b	PND14
37	Gm8730	PND14
38	Arf4	PND14
39	Cirbp	PND14
40	Shfm1	PND14
41	Rps29	PND14
42	Spint2	PND14
43	Ube2i	PND14
44	Rpl41	PND14
45	H2afv	PND14
46	Hmgn1	PND14
47	Hmgb1	PND14
48	BC004004	PND14
49	Snx3	PND14
50	Snrpg	PND14
51	Marcksl1	PND14
52	Dazap2	PND14
53	Arf3	PND14
54	Sumo3	PND14
55	Mzt1	PND14
56	Oaz2	PND14
57	Rac1	PND14
58	Rab11b	PND14
59	Ube2f	PND14
60	Ctbp1	PND14
61	Gng5	PND14
62	Rps12	PND14
63	Tmed2	PND14
64	Atf1	PND14
65	Calr	PND14
66	Mlf2	PND14
67	Srrm2	PND14
68	Srp54b	PND14
69	Arf5	PND14
70	Ndufa1	PND14
71	Yaf2	PND14
72	Dtl	PND14
73	Lamtor1	PND14
74	Cuta	PND14
75	Chd3	PND14
76	Tmem9b	PND14
77	P4hb	PND14
78	Rheb	PND14
79	Chchd4	PND14
80	Fam96b	PND14
81	H2afx	PND14
82	Asf1b	PND14
83	Brk1	PND14
84	Gclm	PND14
85	Rab28	PND14
86	Pcbp2	PND14
87	2018-03-05	PND14
88	Mtpn	PND14
89	Ptma	PND14
90	Tmem147	PND14
91	Zmynd19	PND14
92	Rps28	PND14
93	Rabl2	PND14
94	Dazl	PND14
95	Rps27l	PND14
96	Ftl1	PND14
97	Cst3	PND14
98	Emc10	PND14
99	Yrdc	PND14
100	Rbm38	PND14
101	Ccdc115	PND14
102	Raly	PND14
103	Med10	PND14
104	Ppp2r4	PND14
105	Siva1	PND14
106	Rplp1	PND14
107	Rab18	PND14
108	Anapc5	PND14
109	Sumo1	PND14
110	Mcrs1	PND14
111	Rps12-ps3	PND14
112	Sec61a2	PND14
113	Lman2	PND14
114	Prdx1	PND14
115	Kras	PND14
116	H2-D1	PND14
117	Cycs	PND14
118	Gnb1	PND14
119	Tmem5	PND14
120	Zmynd11	PND14
121	Akirin1	PND14
122	Rps19	PND14
123	Slc25a33	PND14
124	Anp32b	PND14
125	Mov10l1	PND14
126	Fam49b	PND14
127	Nrbp1	PND14
128	Chmp4b	PND14
129	Fam32a	PND14
130	Txndc17	PND14
131	Npm3	PND14
132	Ssr4	PND14
133	Rfxap	PND14
134	Mnd1	PND14
135	Rspry1	PND14
136	Stx16	PND14
137	Cers2	PND14
138	Son	PND14
139	Ubxn1	PND14
140	Rps5	PND14
141	Pin1	PND14
142	Ncl	PND14
143	Lsm5	PND14
144	Unc50	PND14
145	Hdac3	PND14
146	Ube2c	PND14
147	Tomm20	PND14
148	Cnbp	PND14
149	Cks1b	PND14
150	Chchd2	PND14
151	Srsf2	PND14
152	Golga7	PND14
153	Hdac2	PND14
154	Mif	PND14
155	Ei24	PND14
156	Rnps1	PND14
157	Scaf11	PND14
158	Rps27	PND14
159	Sypl	PND14
160	Trim52	PND14
161	Pla2g12a	PND14
162	Cfl1	PND14
163	Smdt1	PND14
164	Cops8	PND14
165	mt-Atp8	PND14
166	4921524J17Rik	PND14
167	Fbxo6	PND14
168	Strn3	PND14
169	H1f0	PND14
170	Emc7	PND14
171	1110004F10Rik	PND14
172	Bet1	PND14
173	Gnai2	PND14
174	Ssr2	PND14
175	Mrps17	PND14
176	Hspe1	PND14
177	Ppp1ca	PND14
178	Pole4	PND14
179	Uri1	PND14
180	Eif5b	PND14
181	Rpl39	PND14
182	Tm2d1	PND14
183	Erlec1	PND14
184	Ube2g1	PND14
185	Cep83	PND14
186	Rpl10	PND14
187	Ctnnbip1	PND14
188	Camta1	PND14
189	Bax	PND14
190	Arl13b	PND14
191	Fopnl	PND14
192	Cdc42	PND14
193	Gar1	PND14
194	Smarcc1	PND14
195	Peli1	PND14
196	Smim7	PND14
197	Rab14	PND14
198	Vapa	PND14
199	Aard	PND14
200	Tsen34	PND14
201	Rhno1	PND14
202	G3bp1	PND14
203	Atp5g2	PND14
204	Churc1	PND14
205	Hat1	PND14
206	Cpsf6	PND14
207	Lsm3	PND14
208	Fbxw2	PND14
209	E2f5	PND14
210	Iqcb1	PND14
211	Ier3ip1	PND14
212	0610010K14Rik	PND14
213	Hormad2	PND14
214	Rpl6	PND14
215	Lsm14a	PND14
216	Ndufb11	PND14
217	Dnajc19	PND14
218	Sod1	PND14
219	l7Rn6	PND14
220	Smc3	PND14
221	Etfa	PND14
222	Pdia6	PND14
223	Selk	PND14
224	Hspd1	PND14
225	Fam204a	PND14
226	Tmem107	PND14
227	Prss50	PND14
228	Ndufa4	PND14
229	Nhp2l1	PND14
230	Arpc1b	PND14
231	BC031181	PND14
232	Pcgf5	PND14
233	Strbp	PND14
234	Lsm6	PND14
235	Syce3	PND14
236	Hspa5	PND14
237	Cacybp	PND14
238	AI846148	PND14
239	Cdk1	PND14
240	Mdk	PND14
241	Srsf6	PND14
242	Rnaset2a	PND14
243	Hsp90ab1	PND14
244	Unc119	PND14
245	Polr2f	PND14
246	Defb19	PND14
247	Top2b	PND14
248	Tipin	PND14
249	Manf	PND14
250	Syce2	PND14
251	Zfp706	PND14
252	Cbx1	PND14
253	Ube2t	PND14
254	Dicer1	PND14
255	Rps4x	PND14
256	Mrps24	PND14
257	Rab34	PND14
258	Ptp4a1	PND14
259	Tmsb4x	PND14
260	Rpl36a	PND14
261	Elavl3	PND14
262	Ktn1	PND14
263	4930447C04Rik	PND14
264	Sycp1	PND14
265	Ube2e1	PND14
266	Sec62	PND14
267	Hmgb2	PND14
268	Rad51ap2	PND14
269	Fmr1nb	PND14
270	Tmed9	PND14
271	Rbm39	PND14
272	Snrpf	PND14
273	Ldhb	PND14
274	Gm364	PND14
275	Cbx3	PND14
276	Malat1	PND14
277	Ly6k	PND14
278	Cst12	PND14
279	Actb	PND14
280	Snrpb	PND14
281	Btf3	PND18
282	Cmtm2a	PND18
283	Ccdc30	PND18
284	1700065L07Rik	PND18
285	Npm1	PND18
286	Cmtm2b	PND18
287	Spink2	PND18
288	Fhl4	PND18
289	Zpbp2	PND18
290	Tex22	PND18
291	4922502D21Rik	PND18
292	Gkap1	PND18
293	Lypd4	PND18
294	1700123L14Rik	PND18
295	C1qtnf4	PND18
296	Rasl2-9	PND18
297	Ppp3r2	PND18
298	Pdcl2	PND18
299	Hoxa4	PND18
300	Dmrtb1	PND18
301	4930518J20Rik	PND18
302	Rpl22l1	PND18
303	Gm2762	PND18
304	Gm128	PND18
305	Mesp1	PND18
306	Ssmem1	PND18
307	Ube2d2b	PND18
308	Eef1a1	PND18
309	Prdx6	PND18
310	Crisp2	PND18
311	Smco2	PND18
312	Tmsb10	PND18
313	Rsph3a	PND18
314	Rpl29	PND18
315	Gpr62	PND18
316	Tcp10b	PND18
317	Nlrp14	PND18
318	Cetn4	PND18
319	Prdx6b	PND18
320	Serf1	PND18
321	Hrasls5	PND18
322	Elof1	PND18
323	1700020D05Rik	PND18
324	4930403D09Rik	PND18
325	4833427G06Rik	PND18
326	Trim69	PND18
327	Pik3ip1	PND18
328	Hrasls	PND18
329	Hspb9	PND18
330	Tbpl1	PND18
331	Tomm22	PND18
332	Lrrc46	PND18
333	Znhit2	PND18
334	Pbp2	PND18
335	Grk4	PND18
336	RP23-2D23.2	PND18
337	H2-Ab1	PND18
338	Spata4	PND18
339	Phospho2	PND18
340	4933427E11Rik	PND18
341	Ropn1l	PND18
342	Pabpc2	PND18
343	Meig1	PND18
344	Fgfr1op2	PND18
345	1700026J12Rik	PND18
346	Ccdc83	PND18
347	1700074P13Rik	PND18
348	Pdzd9	PND18
349	Tex40	PND18
350	1700018B24Rik	PND18
351	Gk2	PND18
352	1700110I01Rik	PND18
353	Ccdc38	PND18
354	Them6	PND18
355	Asrgl1	PND18
356	Nubp2	PND18
357	Mypop	PND18
358	Tmem217	PND18
359	Cetn1	PND18
360	1700011E24Rik	PND18
361	Nudt18	PND18
362	1700108J01Rik	PND18
363	Tmem202	PND18
364	Ntpcr	PND18
365	Mad2l2	PND18
366	Tcte2	PND18
367	Fam229b	PND18
368	Mns1	PND18
369	1700018L02Rik	PND18
370	Efhd1	PND18
371	Ovol2	PND18
372	Adam5	PND18
373	Spata1	PND18
374	1700108N11Rik	PND18
375	Itgae	PND18
376	4930589P08Rik	PND18
377	Abcc3	PND18
378	Kcnmb4os1	PND18
379	Dnajb2	PND18
380	Plpp1	PND18
381	Smim24	PND18
382	Prps1l1	PND18
383	Rnaseh2a	PND18
384	Hsbp1	PND18
385	1700047G03Rik	PND18
386	Gpr160	PND18
387	Neil3	PND18
388	Slc22a16	PND18
389	Tmem97	PND18
390	Adam32	PND18
391	Gm17227	PND18
392	4930544G11Rik	PND18
393	Tekt3	PND18
394	Rsph6a	PND18
395	Ypel1	PND18
396	1700025F22Rik	PND18
397	4931417E11Rik	PND18
398	Dapp1	PND18
399	Gm43352	PND18
400	Lin7a	PND18
401	Csnk2b	PND18
402	Bcap29	PND18
403	Tcp10a	PND18
404	Arsa	PND18
405	Exosc3	PND18
406	4933429H19Rik	PND18
407	Gm5142	PND18
408	1700086L19Rik	PND18
409	Pabpc6	PND18
410	Ccdc7b	PND18
411	Dusp19	PND18
412	Nme5	PND18
413	Bbof1	PND18
414	Arl4a	PND18
415	Uba52	PND18
416	4930455B14Rik	PND18
417	Dnajb1	PND18
418	Art3	PND18
419	1700017D01Rik	PND18
420	Gtf2a1l	PND18
421	Znhit3	PND18
422	Toporsl	PND18
423	1700039E15Rik	PND18
424	Gm21967	PND18
425	Abhd11	PND18
426	Grtp1	PND18
427	Rnf32	PND18
428	Frs3os	PND18
429	Fank1	PND18
430	Cfap161	PND18
431	Gm42918	PND18
432	Svbp	PND18
433	1110006O24Rik	PND18
434	Spata16	PND18
435	Ppp2cb	PND18
436	Pou5f2	PND18
437	Aprt	PND18
438	Fam98c	PND18
439	Kcnmb4	PND18
440	Tmbim7	PND18
441	Atpif1	PND18
442	Tprn	PND18
443	Ccdc178	PND18
444	Rdh11	PND18
445	Slc22a21	PND18
446	Tcp10c	PND18
447	Aqp9	PND18
448	Peli2	PND18
449	1700029F12Rik	PND18
450	Adam3	PND18
451	Gsg2	PND18
452	Tomm20l	PND18
453	1700003H04Rik	PND18
454	Ppp1r14b	PND18
455	Gm26611	PND18
456	Papolb	PND18
457	4933415F23Rik	PND18
458	D030056L22Rik	PND18
459	Slc2a5	PND18
460	Ggn	PND18
461	Dyrk3	PND18
462	Gm5617	PND18
463	Fam50b	PND18
464	Hdgfl1	PND18
465	Mesdc2	PND18
466	Gm2415	PND18
467	Gm10762	PND18
468	Tlcd1	PND18
469	Ankrd7	PND18
470	Bspry	PND18
471	Serp1	PND18
472	Crtam	PND18
473	Ldhal6b	PND18
474	Pebp4	PND18
475	BC048502	PND18
476	Sbds	PND18
477	Ankar	PND18
478	Cct6b	PND18
479	Baiap2	PND18
480	Cenpn	PND18
481	Cfap53	PND18
482	Crcp	PND18
483	Ppp1r27	PND18
484	Vps26a	PND18
485	Stard6	PND18
486	Myl10	PND18
487	Slc9b1	PND18
488	4932702P03Rik	PND18
489	Nkapl	PND18
490	Ccdc7a	PND18
491	Dnali1	PND18
492	Dgkeos	PND18
493	Nudt4	PND18
494	Fdft1	PND18
495	Pgam2	PND18
496	Ccna1	PND18
497	Zpbp	PND18
498	Xkr8	PND18
499	Efcab6	PND18
500	Dnaaf1	PND18
501	Bag5	PND18
502	Kcnj9	PND18
503	Insl6	PND18
504	Mzt2	PND18
505	0610009L18Rik	PND18
506	Catsper2	PND18
507	Dusp15	PND18
508	Gm19412	PND18
509	Ldhc	PND18
510	Izumo4	PND18
511	Hagh	PND18
512	Gykl1	PND18
513	Speer2	PND18
514	Aqp11	PND18
515	Cfap45	PND18
516	Dnajb14	PND18
517	Cdkn3	PND18
518	Svip	PND18
519	Spag6l	PND18
520	Akirin2	PND18
521	1700003I22Rik	PND18
522	Prss39	PND18
523	Larp1b	PND25
524	Gm10638	PND25
525	Tnrc6c	PND25
526	Cypt4	PND25
527	Tcte3	PND25
528	Hils1	PND25
529	Rnf151	PND25
530	Cypt12	PND25
531	Rbmxl2	PND25
532	Morn5	PND25
533	Hbb-bs	PND25
534	Zfp91	PND25
535	Sav1	PND25
536	Shcbp1l	PND25
537	Baz1a	PND25
538	Atp8b3	PND25
539	Hba-a1	PND25
540	Uqcrb	PND25
541	Mroh4	PND25
542	Gm17359	PND30
543	RP23-66E21.1	PND30
544	Pdxdc1	PND30
545	Gm10076	PND30
546	Rpl37	PND30
547	Trim37	PND30
548	Rpl35	PND30
549	Riiad1	PND30
550	Gm10073	PND30
551	Mt2	PND30
552	Hba-a2	PND30
553	BC051142	PND30
554	Mt1	PND30
555	4930539J05Rik	PND30
556	Tuba3b	Ad-depleteSp
557	Smcp	Ad-depleteSp
558	Tuba3a	Ad-depleteSp
559	Kdm5b	Ad-depleteSp
560	Sf3b2	Ad-depleteSp
561	Rnf17	Ad-depleteSp
562	Hnrnpk	Ad-depleteSp
563	Psmd2	Ad-depleteSp
564	Pdia3	Ad-depleteSp
565	Ufl1	Ad-depleteSp
566	Ddx4	Ad-depleteSp
567	Dnttip1	Ad-depleteSp
568	Tdrd5	Ad-depleteSp
569	Supt16	Ad-depleteSp
570	Exosc7	Ad-depleteSp
571	Id4	Ad-depleteSp
572	Mdm2	Ad-depleteSp
573	Fyttd1	Ad-depleteSp
574	Piwil1	Ad-depleteSp
575	Thrap3	Ad-depleteSp
576	Stk31	Ad-depleteSp
577	Pcm1	Ad-depleteSp
578	Ruvbl1	Ad-depleteSp
579	Sf3b1	Ad-depleteSp
580	Kctd19	Ad-depleteSp
581	Pdcd7	Ad-depleteSp
582	Pdha2	Ad-depleteSp
583	Aplp2	Ad-depleteSp
584	Nmnat3	Ad-depleteSp
585	Psip1	Ad-depleteSp
586	Cct8	Ad-depleteSp
587	Ccdc61	Ad-depleteSp
588	Psmb5	Ad-depleteSp
589	Dlat	Ad-depleteSp
590	Ddx39	Ad-depleteSp
591	Oaz3	Ad-depleteSp
592	Dazap1	Ad-depleteSp
593	Hspa4l	Ad-depleteSp
594	Ddb1	Ad-depleteSp
595	Slbp	Ad-depleteSp
596	Gpat2	Ad-depleteSp
597	Dnpep	Ad-depleteSp
598	Arglu1	Ad-depleteSp
599	Uqcrc1	Ad-depleteSp
600	Psma5	Ad-depleteSp
601	Vcp	Ad-depleteSp
602	Nudc	Ad-depleteSp
603	Psma8	Ad-depleteSp
604	Prc1	Ad-depleteSp
605	Scaper	Ad-depleteSp
606	Zfp318	Ad-depleteSp
607	Psmc4	Ad-depleteSp
608	Fignl1	Ad-depleteSp
609	Bcas2	Ad-depleteSp
610	Psmb7	Ad-depleteSp
611	Bag6	Ad-depleteSp
612	Gm4763	Ad-depleteSp
613	Dut	Ad-depleteSp
614	Armt1	Ad-depleteSp
615	Mtmr6	Ad-depleteSp
616	Cdc20	Ad-depleteSp
617	Emc2	Ad-depleteSp
618	Tkfc	Ad-depleteSp
619	Trim28	Ad-depleteSp
620	1700012A03Rik	Ad-depleteSp
621	Gmcl1	Ad-depleteSp
622	Hnrnpf	Ad-depleteSp
623	Ruvbl2	Ad-depleteSp
624	Stambp	Ad-depleteSp
625	Isyna1	Ad-depleteSp
626	Pde8a	Ad-depleteSp
627	Tssk6	Ad-depleteSp
628	Prm2	Ad-Thy1
629	Prm1	Ad-Thy1
630	Tnp2	Ad-Thy1
631	Tnp1	Ad-Thy1
632	Gapdhs	Ad-Thy1
633	4933411K16Rik	Ad-Thy1
634	1700027A15Rik	Ad-Thy1
635	Spata3	Ad-Thy1
636	Gsg1	Ad-Thy1
637	1700015G11Rik	Ad-Thy1
638	1700009N14Rik	Ad-Thy1
639	Ube2n	Ad-Thy1
640	Dnajb8	Ad-Thy1
641	Gm9999	Ad-Thy1
642	Tppp2	Ad-Thy1
643	1700024P04Rik	Ad-Thy1
644	1700016P04Rik	Ad-Thy1
645	Ubl4b	Ad-Thy1
646	Hmgb4	Ad-Thy1
647	Lelp1	Ad-Thy1
648	Spz1	Ad-Thy1
649	Spata18	Ad-Thy1
650	Cdrt4	Ad-Thy1
651	1700031M16Rik	Ad-Thy1
652	Cabs1	Ad-Thy1
653	1700001C19Rik	Ad-Thy1
654	Nupr1l	Ad-Thy1
655	1700029H14Rik	Ad-Thy1
656	Car2	Ad-Thy1
657	Znrf4	Ad-Thy1
658	1700001O22Rik	Ad-Thy1
659	Osbp2	Ad-Thy1
660	AI507597	Ad-Thy1
661	Iqcf3	Ad-Thy1
662	Paqr5	Ad-Thy1
663	1700001K19Rik	Ad-Thy1
664	Fam71e1	Ad-Thy1
665	Iqcf4	Ad-Thy1
666	Ms4a5	Ad-Thy1
667	Prm3	Ad-Thy1
668	Akap4	Ad-Thy1
669	Actrt2	Ad-Thy1
670	1700016H13Rik	Ad-Thy1
671	H1fnt	Ad-Thy1
672	Gm44205	Ad-Thy1
673	4930503B20Rik	Ad-Thy1
674	St6galnac2	Ad-Thy1
675	Spert	Ad-Thy1
676	Otub2	Ad-Thy1
677	4933402P03Rik	Ad-Thy1
678	1700042G07Rik	Ad-Thy1
679	Slfnl1	Ad-Thy1
680	4930571K23Rik	Ad-Thy1
681	Wbscr25	Ad-Thy1
682	Clpb	Ad-Thy1
683	Irgc1	Ad-Thy1
684	Bcl2l14	Ad-Thy1
685	1700009J07Rik	Ad-Thy1
686	Gabarapl1	Ad-Thy1
687	Csnk1g2	Ad-Thy1
688	D830044I16Rik	Ad-Thy1
689	4930544D05Rik	Ad-Thy1
690	1700034E13Rik	Ad-Thy1
691	2610318N02Rik	Ad-Thy1
692	1700019D03Rik	Ad-Thy1
693	Ccdc91	Ad-Thy1
694	Habp4	Ad-Thy1
695	Spem1	Ad-Thy1
696	Sh3rf2	Ad-Thy1
697	1700029B22Rik	Ad-Thy1
698	Ttc24	Ad-Thy1
699	Tmem53	Ad-Thy1
700	Cdv3	Ad-Thy1
701	Ift172	Ad-Thy1
702	Atl3	Ad-Thy1
703	Fam71f2	Ad-Thy1
704	Iqcf5	Ad-Thy1
705	Dynll2	Ad-Thy1
706	Lrrc57	Ad-Thy1
707	Tssk2	Ad-Thy1
708	Gm498	Ad-Thy1
709	Tssk3	Ad-Thy1
710	Tex35	Ad-Thy1
711	Aif1	Ad-Thy1
712	Tsks	Ad-Thy1
713	Bpifa3	Ad-Thy1
714	Oxct2b	Ad-Thy1
715	1700003F12Rik	Ad-Thy1
716	2810408A11Rik	Ad-Thy1
717	Dynll1	Ad-Thy1
718	Azin2	Ad-Thy1
719	1700013G24Rik	Ad-Thy1
720	Pkib	Ad-Thy1
721	Stard10	Ad-Thy1
722	Hypm	Ad-Thy1
723	Glul	Ad-Thy1
724	Pwwp2b	Ad-Thy1
725	Bzw1	Ad-Thy1
726	Odf1	Ad-Thy1
727	H2afb1	Ad-Thy1
728	1700080E11Rik	Ad-Thy1
729	Acsl1	Ad-Thy1
730	Vasp	Ad-Thy1
731	Cstl1	Ad-Thy1
732	1700034I23Rik	Ad-Thy1
733	Lrrc18	Ad-Thy1
734	Gstt4	Ad-Thy1
735	Gm6760	Ad-Thy1
736	1110017D15Rik	Ad-Thy1
737	Cst8	Ad-Thy1
738	Iqcf1	Ad-Thy1
739	Nt5c1b	Ad-Thy1
740	Ccdc54	Ad-Thy1
741	1700020A23Rik	Ad-Thy1
742	Rnf138	Ad-Thy1
743	Morn3	Ad-Thy1
744	Dnajc5b	Ad-Thy1
745	Prkar2a	Ad-Thy1
746	Akap1	Ad-Thy1
747	Klhl10	Ad-Thy1
748	Rcc1	Ad-Thy1
749	Smkr-ps	Ad-Thy1
750	4930563D23Rik	Ad-Thy1
751	Tmem247	Ad-Thy1
752	Carhsp1	Ad-Thy1
753	Chl1	Ad-Thy1
754	Tctex1d1	Ad-Thy1
755	Galntl5	Ad-Thy1
756	BB014433	Ad-Thy1
757	Tex37	Ad-Thy1
758	Ccsap	Ad-Thy1
759	Txndc2	Ad-Thy1
760	Col22a1	Ad-Thy1
761	Agpat2	Ad-Thy1
762	Rundc3a	Ad-Thy1
763	4921507P07Rik	Ad-Thy1
764	Ak1	Ad-Thy1
765	Reep6	Ad-Thy1
766	Defb33	Ad-Thy1
767	Psma6	Ad-Thy1
768	Actg2	Ad-Thy1
769	Oxct2a	Ad-Thy1
770	Spata19	Ad-Thy1
771	Izumo2	Ad-Thy1
772	Hk1	Ad-Thy1
773	Herpud1	Ad-Thy1
774	Gm15756	Ad-Thy1
775	Fam229a	Ad-Thy1
776	5031439G07Rik	Ad-Thy1
777	Smim23	Ad-Thy1
778	Proca1	Ad-Thy1
779	Gpi1	Ad-Thy1
780	1700018C11Rik	Ad-Thy1
781	Tex30	Ad-Thy1
782	1700034O15Rik	Ad-Thy1
783	Tepp	Ad-Thy1
784	Tbc1d20	Ad-Thy1
785	Psmf1	Ad-Thy1
786	Tfam	Ad-Thy1
787	Akap12	Ad-Thy1
788	Hnrnpa2b1	Ad-Thy1
789	Luzp1	Ad-Thy1
790	Tmem56	Ad-Thy1
791	Stk35	Ad-Thy1
792	Gml	Ad-Thy1
793	Ubl3	Ad-Thy1
794	Stmn1	Ad-Thy1
795	Arl6ip1	Ad-Thy1
796	Efhd2	Ad-Thy1
797	Eif4h	Ad-Thy1
798	Ppp4r2	Ad-Thy1
799	Ube2k	Ad-Thy1
800	Fam71f1	Ad-Thy1
801	mt-Nd2	Ad-Thy1
802	Spata20	Ad-Thy1
803	Dcun1d1	Ad-Thy1
804	Spata21	Ad-Thy1
805	Dbil5	Ad-Thy1
806	mt-Co2	Ad-Thy1
807	H3f3b	Ad-Thy1
808	Rpia	Ad-Thy1
809	Gml2	Ad-Thy1
810	Cyc1	Ad-Thy1
811	Gpat4	Ad-Thy1
812	Ropn1	Ad-Thy1
813	Sycp3	Ad-Thy1
814	Park7	Ad-Thy1
815	Ddx39b	Ad-Thy1
816	Paip2	Ad-Thy1
817	Rbx1	Ad-Thy1
818	Mlf1	Ad-Thy1
819	Mrpl27	Ad-Thy1
820	Pfdn2	Ad-Thy1
821	Tmco1	Ad-Thy1
822	Prdx4	Ad-Thy1
823	Psmb2	Ad-Thy1
824	Pex7	Ad-Thy1
825	Fbxo3	Ad-Thy1
826	Srsf3	Ad-Thy1
827	Prmt1	Ad-Thy1
828	Hnrnpd	Ad-Thy1
829	Acin1	Ad-Thy1
830	Chtop	Ad-Thy1
831	Canx	Ad-Thy1
832	Fus	Ad-Thy1
833	Ssb	Ad-Thy1
834	Nae1	Ad-Thy1
835	Kcnq1ot1	Ad-Thy1
